# Supplementary material for: Effects of solution chemistry on the attachment of graphene oxide onto clay minerals
Source: Royal Society of Chemistry journal article supplement (doi:10.1039/c8em00480c), 2019-01-01
Supplement: c8em00480c1.pdf [file c8em00480c1.pdf]

## **Supplementary Information**

### **Effects of solution chemistry on the attachment of graphene oxide onto clay minerals**

Xiaoyan Lu,<sup>1, 2, a</sup> Taotao Lu<sup>3, a</sup> Haojing Zhang,<sup>1</sup> Zhongbo Shang,<sup>1</sup> Jiuyan Chen,<sup>2</sup>  
Ying Wang,<sup>2</sup> Deliang Li,<sup>1</sup> Yanmei Zhou,<sup>1</sup> and Zhichong Qi,<sup>1\*</sup>

<sup>1</sup> Institute of Environmental and Analytical Sciences, Henan Joint International  
Research Laboratory of Environmental Pollution Control Materials, College of Chemistry  
and Chemical Engineering, Henan University, Kaifeng 475004, China

<sup>2</sup> Henan University Minsheng College, Kaifeng 475004, China

<sup>3</sup> Department of Hydrology, University of Bayreuth, Bayreuth 95440, Germany

\*Corresponding author: Zhichong Qi (qizhichong1984@163.com)

<sup>a</sup> Xiaoyan Lu and Taotao Lu contributed equally.

### ***Calculation of DLVO interaction energy***

According to the Derjaguin–Landau–Verwey–Overbeek (DLVO) theory, the total interaction energy between particle and collector ( $V_{TOT}$ ) can be defined as the sum of two interactions, the attractive van der Waals interaction ( $V_{VDW}$ ) and the repulsive electrostatic double layer interaction ( $V_{EDL}$ )<sup>S1</sup>:

$$V_{TOT} = V_{VDW} + V_{EDL} \quad (S1)$$

The van der Waals interaction is calculated using the Hamaker approach and Gregory's formulation<sup>S2</sup>:

$$V_{VDW} = -\frac{Ar_{NP}}{6h\left(1 + \frac{14h}{\lambda}\right)} \quad (S2)$$

Where  $r_{NP}$  is the radius of GO nanoparticles,  $h$  is the separation distance between GO nanoparticles and quartz surface,  $\lambda$  is the characteristic wavelength of GO nanoparticle ( $\lambda = 100$  nm), and  $A$  is the Hamaker constant.  $A = 8.31 \times 10^{-21}$  J<sup>S3</sup> was used for graphene particle- kaolinite interaction. For graphene- montmorillonite interaction, The Hamaker constant of GO nanoparticles- water- montmorillonite system can be calculated by following equation<sup>S4</sup>:

$$A_{132} = \left(\sqrt{A_{11}} - \sqrt{A_{33}}\right)\left(\sqrt{A_{22}} - \sqrt{A_{33}}\right) \quad (S5)$$

Where  $A_{132}$  is the Hamaker constant for the material 1 (GO nanoparticle) interaction with the material 2 (collector) through the material 3 (water),  $A_{11}$ , is the Hamaker constant of the GO, which is assumed to be  $6.34 \times 10^{-20}$  J,<sup>S5</sup>  $A_{22}$  is the Hamaker constant of the collector surface, which is  $6.49 \times 10^{-20}$  J,<sup>S6</sup> and  $A_{33}$  is the Hamaker constant of water, which is  $3.70 \times 10^{-20}$  J<sup>S7</sup>. Then, the Hamaker constant value of nanoparticles-water- montmorillonite system ( $A_{132}$ ) is obtained from above equations to be  $3.70 \times 10^{-21}$  J.

With the assumption of constant potential at the surface, the electrical double layer interaction can be calculated as<sup>S8</sup>:

$$V_{EDL} = \pi r_{NP} \varepsilon_0 \varepsilon_r \left\{ 2\phi_1 \phi_2 \ln \left[ \frac{1 + \exp(-\kappa h)}{1 - \exp(-\kappa h)} \right] + (\phi_1^2 + \phi_2^2) \ln [1 - \exp(-2\kappa h)] \right\} \quad (S3)$$

where  $\varepsilon_0$  is the vacuum permittivity ( $8.85 \times 10^{-12}$  C<sup>2</sup>/Jm),  $\varepsilon_r$  is the relative dielectric permittivity of water (78.4),  $\phi_1$  and  $\phi_2$  are the surface potentials of GO nanoparticles and clay, respectively,  $\kappa$  is the Debye reciprocal length and can be calculated as <sup>S9</sup>:

$$\kappa = \sqrt{\frac{2N_A e^2 I}{\varepsilon_r \varepsilon_0 K_B T}} \quad (S4)$$

where  $N_A$  is the Avogadro number ( $6.02 \times 10^{23}$  mol<sup>-1</sup>),  $e$  is the electron charge ( $-1.60 \times 10^{-19}$  C),  $I$  is the ionic strength of the background electrolyte,  $K_B$  is Boltzmann constant ( $1.38 \times 10^{-23}$  J/K), and  $T$  is Kelvin temperature (298 K).

Table S1. Selected Physicochemical Properties of Clay Minerals Tested

| Clay minerals   | Chemical composition                                                                 | Total specific<br>surface area<br>(m <sup>2</sup> /g) | pH <sub>PZC</sub> <sup>[S10-S12]</sup> |
|-----------------|--------------------------------------------------------------------------------------|-------------------------------------------------------|----------------------------------------|
| Montmorillonite | (OH) <sub>4</sub> Si <sub>8</sub> Al <sub>4</sub> O <sub>20</sub> •nH <sub>2</sub> O | 49.4                                                  | 2.5                                    |
| Kaolinite       | Al <sub>4</sub> [Si <sub>4</sub> O <sub>10</sub> ](OH) <sub>8</sub>                  | 19.8                                                  | 3.8                                    |
| Diatomite       | SiO <sub>2</sub> •nH <sub>2</sub> O                                                  | 1.6                                                   | 1.5                                    |

Table S2. Comparison of the  $R^2$  values of the two isotherm models tested in this work.

| Type of clay    | solution chemistry <sup>a</sup>     | pH  | $R^2$ of isotherm model |          |
|-----------------|-------------------------------------|-----|-------------------------|----------|
|                 |                                     |     | Freundlich              | Langmuir |
| Diatomite       | 10 mM NaCl                          | 5.0 | 0.981                   | 0.809    |
| Montmorillonite | 1 mM NaCl                           | 5.0 | 0.929                   | 0.859    |
| Montmorillonite | 10 mM NaCl                          | 5.0 | 0.988                   | 0.924    |
| Montmorillonite | 20 mM NaCl                          | 5.0 | 0.767                   | 0.638    |
| Kaolinite       | 1 mM NaCl                           | 5.0 | 0.908                   | 0.875    |
| Kaolinite       | 10 mM NaCl                          | 5.0 | 0.949                   | 0.933    |
| Kaolinite       | 20 mM NaCl                          | 5.0 | 0.795                   | 0.671    |
| Montmorillonite | 10 mM NaCl                          | 7.0 | 0.991                   | 0.989    |
| Kaolinite       | 10 mM NaCl                          | 7.0 | 0.857                   | 0.806    |
| Montmorillonite | 10 mM NaCl                          | 9.0 | 0.868                   | 0.823    |
| Kaolinite       | 10 mM NaCl                          | 9.0 | 0.884                   | 0.812    |
| Montmorillonite | 0.1 mM CaCl <sub>2</sub>            | 5.0 | 0.887                   | 0.786    |
| Kaolinite       | 0.1 mM CaCl <sub>2</sub>            | 5.0 | 0.817                   | 0.658    |
| Montmorillonite | 0.3 mM CaCl <sub>2</sub>            | 5.0 | 0.753                   | 0.817    |
| Kaolinite       | 0.3 mM CaCl <sub>2</sub>            | 5.0 | 0.858                   | 0.830    |
| Montmorillonite | 10 mM NaCl + 0.1 mM TA <sup>a</sup> | 5.0 | 0.901                   | 0.803    |
| Kaolinite       | 10 mM NaCl + 0.1 mM TA              | 5.0 | 0.957                   | 0.785    |

<sup>a</sup> TA represent tartaric acid.

Table S3. Calculated Maximum Energy Barriers ( $\Phi_{\max}$ ) and The Respective Separation Distances of Particle–Collector DLVO Interaction Energy Profiles

| Type of clay    | solution chemistry <sup>a</sup>     | pH  | $\zeta$ potential of GO <sup>b</sup><br>(mV) | $Z_{\text{ave-GO}}^c$<br>(nm) | $\zeta$ potential of clay <sup>d</sup><br>(mV) | $\Phi_{\max}$         |                  |
|-----------------|-------------------------------------|-----|----------------------------------------------|-------------------------------|------------------------------------------------|-----------------------|------------------|
|                 |                                     |     |                                              |                               |                                                | height<br>( $K_B T$ ) | distance<br>(nm) |
| Diatomite       | 10 mM NaCl                          | 5.0 | -23.8 ± 0.4                                  | 256.3 ± 10.1                  | -25.2 ± 1.9                                    | 62.9                  | 1.1              |
| Montmorillonite | 1 mM NaCl                           | 5.0 | -41.2 ± 1.1                                  | 192.8 ± 8.5                   | -15.8 ± 0.7                                    | 46.1                  | 4.6              |
| Montmorillonite | 10 mM NaCl                          | 5.0 | -23.8 ± 0.4                                  | 256.3 ± 10.1                  | -11.6 ± 0.9                                    | 20.6                  | 1.8              |
| Montmorillonite | 20 mM NaCl                          | 5.0 | -18.7 ± 0.9                                  | 283.2 ± 13.7                  | -8.6 ± 0.9                                     | 5.79                  | 2.0              |
| Kaolinite       | 1 mM NaCl                           | 5.0 | -41.2 ± 1.1                                  | 192.8 ± 8.5                   | -16.9 ± 0.5                                    | 65.6                  | 4.4              |
| Kaolinite       | 10 mM NaCl                          | 5.0 | -23.8 ± 0.4                                  | 256.3 ± 10.1                  | -12.2 ± 0.2                                    | 13.8                  | 2.5              |
| Kaolinite       | 20 mM NaCl                          | 5.0 | -18.7 ± 0.9                                  | 283.2 ± 13.7                  | -10.3 ± 0.2                                    | 1.1                   | 2.5              |
| Montmorillonite | 10 mM NaCl                          | 7.0 | -26.4 ± 0.5                                  | 245.1 ± 9.2                   | -14.8 ± 0.4                                    | 34.2                  | 1.4              |
| Kaolinite       | 10 mM NaCl                          | 7.0 | -26.4 ± 0.5                                  | 245.1 ± 9.2                   | -25.7 ± 0.7                                    | 61.6                  | 1.3              |
| Montmorillonite | 10 mM NaCl                          | 9.0 | -29.6 ± 0.3                                  | 228.8 ± 4.5                   | -21.8 ± 1.2                                    | 66.6                  | 1.0              |
| Kaolinite       | 10 mM NaCl                          | 9.0 | -29.6 ± 0.3                                  | 228.8 ± 4.5                   | -33.6 ± 0.6                                    | 102.9                 | 1.1              |
| Montmorillonite | 0.1 mM CaCl <sub>2</sub>            | 5.0 | -23.2 ± 1.2                                  | 232.5 ± 6.9                   | -25.5 ± 0.8                                    | 89.4                  | 2.7              |
| Kaolinite       | 0.1 mM CaCl <sub>2</sub>            | 5.0 | -23.2 ± 1.2                                  | 232.5 ± 6.9                   | -25.6 ± 1.7                                    | 81.8                  | 2.3              |
| Montmorillonite | 0.3 mM CaCl <sub>2</sub>            | 5.0 | -20.6 ± 0.4                                  | 276.6 ± 12.3                  | -23.6 ± 0.9                                    | 78.6                  | 4.0              |
| Kaolinite       | 0.3 mM CaCl <sub>2</sub>            | 5.0 | -20.6 ± 0.4                                  | 276.6 ± 12.3                  | -24.8 ± 1.1                                    | 78.9                  | 3.8              |
| Montmorillonite | 10 mM NaCl + 0.1 mM TA <sup>a</sup> | 5.0 | -22.1 ± 0.7                                  | 175.5 ± 7.3                   | -21.3 ± 0.2                                    | 57.1                  | 1.1              |
| Kaolinite       | 10 mM NaCl + 0.1 mM TA              | 5.0 | -22.1 ± 0.7                                  | 175.5 ± 7.3                   | -20.5 ± 0.6                                    | 70.2                  | 3.5              |

<sup>a</sup> TA represent tartaric acid.

<sup>b</sup>Zeta potential of GO; values after ± sign represent standard deviation of three replicates.

<sup>c</sup>Hydrodynamic diameter of GO based on DLS analysis, values after ± sign represent standard deviation of three replicates.

<sup>d</sup>Zeta potential of clay mineral; values after ± sign represent standard deviation of three replicates.

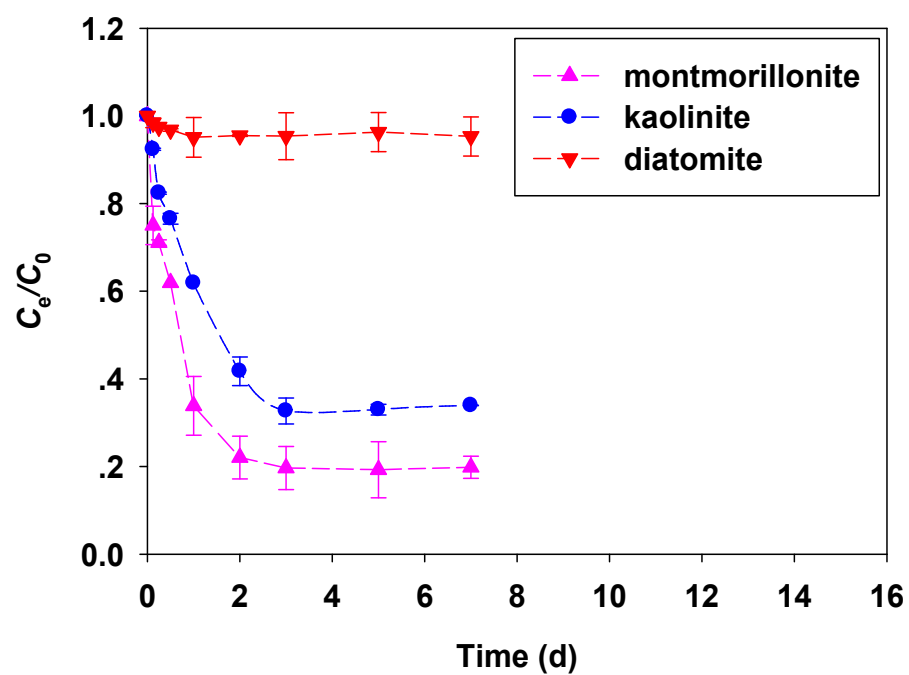

**Fig. S1** Time required to reach equilibrium attachment of GO to clay ( $m_{\text{clay}}=0.1$  g).  $C_e$  is the concentration of GO in liquid phase at time  $t$ ;  $C_0$  (15 mg/L) is the total GO concentration in the solution at  $t = 0$ . Error bars indicate standard deviation of triplicate samples.

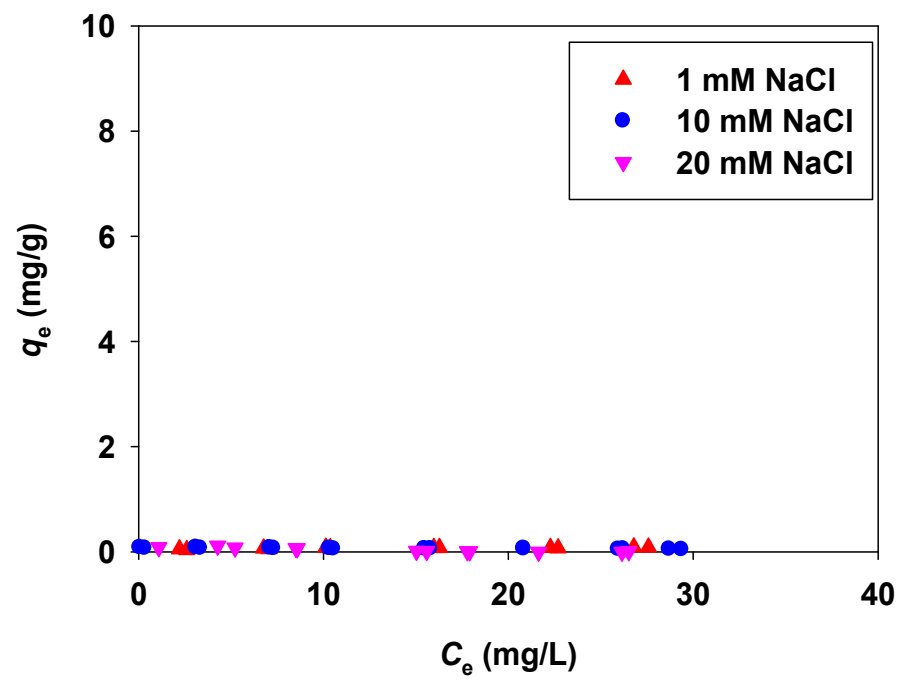

**Fig. S2** Effect of ionic strength on the attachment of GO onto diatomite.



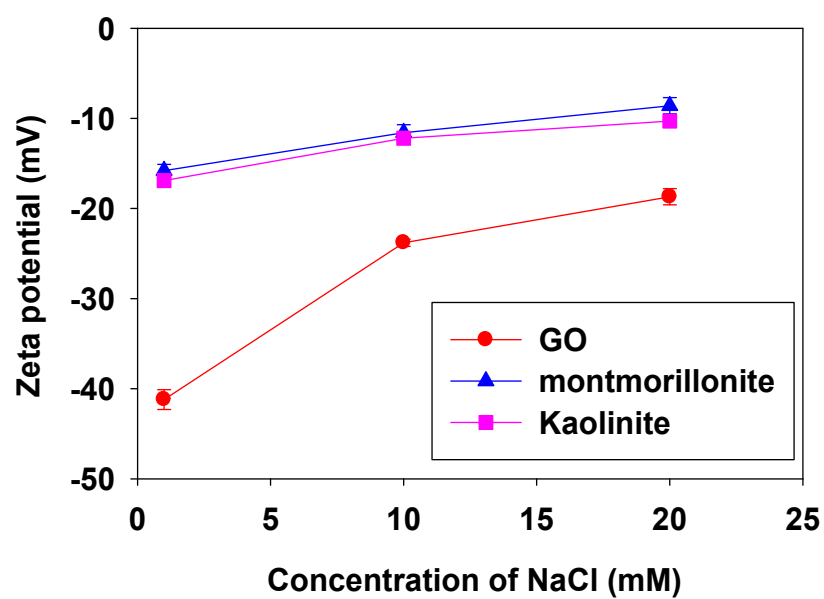

**Fig. S3** Zeta potential of GO and clay minerals in three different concentrations of NaCl solution. Error bars indicate standard deviation of triplicate samples.

## References

- S1 R. Hogg, T. W. Healy, D. W. Fuerstenau, Mutual coagulation of colloidal dispersions. *Trans Faraday Soc*, 1966, **18**, 1638-1651.
- S2 J. Gregory, Approximate expressions for retarded van der waals interaction. *J. Colloid Interf. Sci.*, 1981, **83**, 138-145.
- S3 N.P. Sotirelis, C.V. Chrysikopoulos, Heteroaggregation of graphene oxide nanoparticles and kaolinite colloids. *Sci. Total Environ.*, 2016, **579**, 736-744.
- S4 J. Bergendahl, D. Grasso, Prediction of colloid detachment in a model porous media: Thermodynamics. *Aiche J.*, 1999, **45**, 475-484.
- S5 L. Feriencikova, S. Xu, Deposition and remobilization of graphene oxide within saturated sand packs. 2012, *J. Hazard. Mater*, **235**, 194-200.
- S6 H. Li, X. Peng, L. Wu, M. Jia and H. Zhu, Surface potential dependence of the Hamaker constant, *J. Phys. Chem. C*, 2009, **113**, 4419-4425.
- S7 J. N. Israelachvili, Intermolecular and Surface Forces. 1992, Academic Press: San Diego, CA.
- S8 M. Elimelech, C. R. O'Melia, Effect of particle size on collision efficiency in the deposition of Brownian particles with electrostatic energy barriers. 1990, *Langmuir* **6**, 1153-1163.
- S9 W. B. Russel, D. A. Saville, W. R. Schowalter, Colloidal Dispersions. 1989, Cambridge University Press, Cambridge.
- S10. V. P. Evangelou, Environmental Soil and Water Chemistry: Principles and Applications, 1998, John Wiley & Sons: New York.
- S11. C. Appel, Q.M. Lena, R. Dean Rhue and E. Kennelley, Point of zero charge determination in soils and minerals via traditional methods and detection of electroacoustic mobility *Geoderma*, 2003, **113**, 77-93.
- S12. W. T. Tsai, K. J. Hsien, Y. M. Chang and C. C. Lo, Removal of herbicide paraquat from an aqueous solution by adsorption onto spent and treated diatomaceous earth. 2005, *Bioresour Technol*, **96**, 657-663.
